# Supplementary material for: Receptor-like Kinases (LRR-RLKs) in Response of Plants to Biotic and Abiotic Stresses
Source: MDPI journal article supplement (doi:10.3390/plants11192660), 2022-10-10
Supplement: s1 [file s1]

Supplementary Materials

# Receptor-like Kinases (LRR-RLKs) in Response of Plants to Biotic and Abiotic Stresses

**Aigerim Soltabayeva <sup>1,\*</sup>, Nurbanu Dauletova <sup>1</sup>, Symbat Serik <sup>1</sup>, Margulan Sandybek <sup>1</sup>, John Okoth Omondi <sup>2</sup>, Assylay Kurmanbayeva <sup>3</sup> and Sudhakar Srivastava <sup>4</sup>**

<sup>1</sup> Biology Department, School of Science and Humanities, Nazarbayev University, Astana 010000, Kazakhstan

<sup>2</sup> International Institute of Tropical Agriculture, Lilongwe P.O. Box 30258, Malawi

<sup>3</sup> Department of Biotechnology and Microbiology, L.N. Gumilyov Eurasian National University, Astana 010000, Kazakhstan

<sup>4</sup> NCS-TCP, National Institute of Plant Genome Research, New Delhi 110067, India

\* Correspondence: aigerim.soltabayeva@nu.edu.kz.

**Dataset:** 23 perturbations from data selection: Arabidopsis ATH1 database

Showing 7 measure(s) of 7 gene(s) on selection: Both

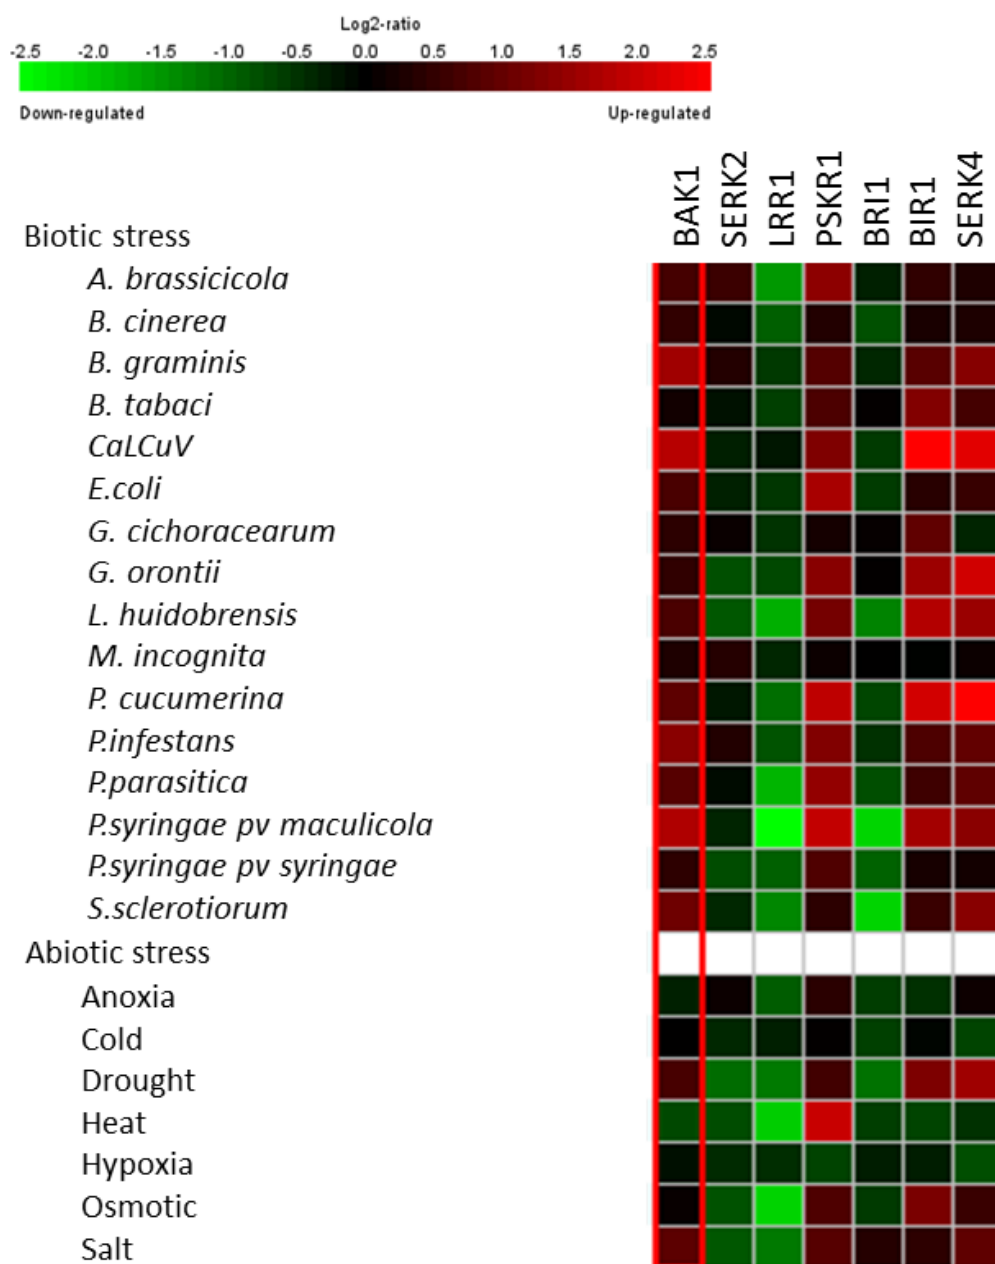

created with GENEVESTIGATOR

**Supplementary Figure S1.** Microarray analysis of the biotic and abiotic stress related LRR-RLK genes transcripts in response to biotic and abiotic stresses in WT (Col ecotype). Data was obtained from published microarray collections from Affymetrix *Arabidopsis* ATH1 Genome Array platform in Genevestigator (<https://genevestigator.com/>). Compendium-wide analysis was used to display the results by a condition search tool called perturbations. Data is displayed in the form of heatmap, which is based on Log2-ratio. Biotic and abiotic stress related LRR-RLK genes list from Supplemental table S1.

**Dataset:** 23 perturbations from data selection: Arabidopsis ATH1 database

Showing 7 measure(s) of 7 gene(s) on selection: Only biotic

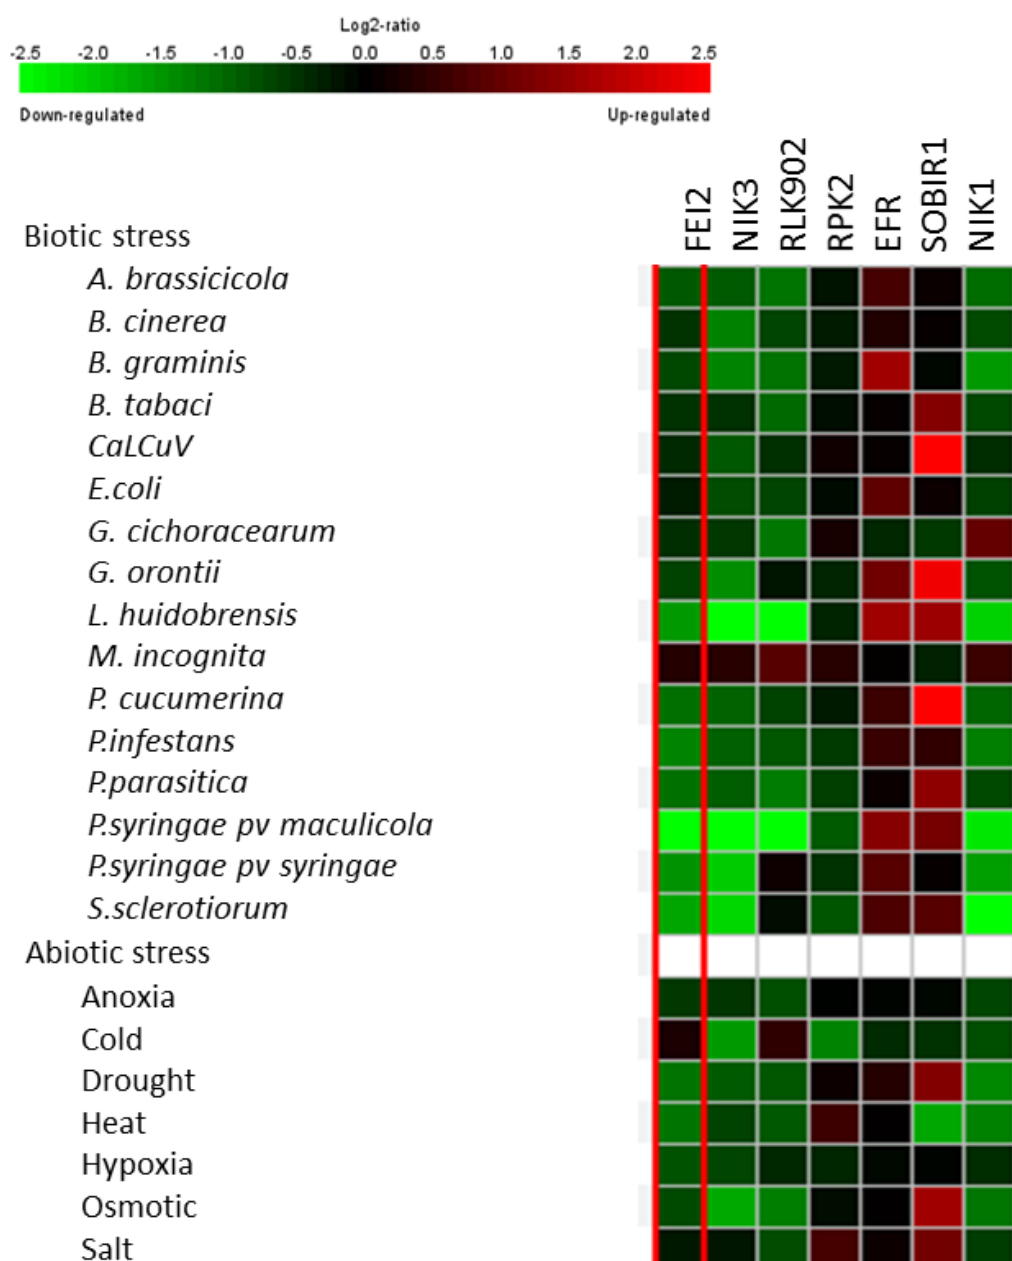

created with GENEVESTIGATOR

**Supplementary Figure S2.** Microarray analysis of the biotic stress related LRR-RLK genes transcripts in response to biotic and abiotic stresses in WT (Col ecotype). Data was obtained from published microarray collections from Affymetrix *Arabidopsis* ATH1 Genome Array platform in Genevestigator (<https://genevestigator.com/>). Compendium-wide analysis was used to display the results by a condition search tool called perturbations. Data is displayed in the form of heatmap, which is based on Log2-ratio. Biotic stress related LRR-RLK genes list from Supplemental table 1.

Dataset: 23 perturbations from data selection: Arabidopsis ATH1 database

Showing 10 measure(s) of 10 gene(s) on selection: Only abiotic

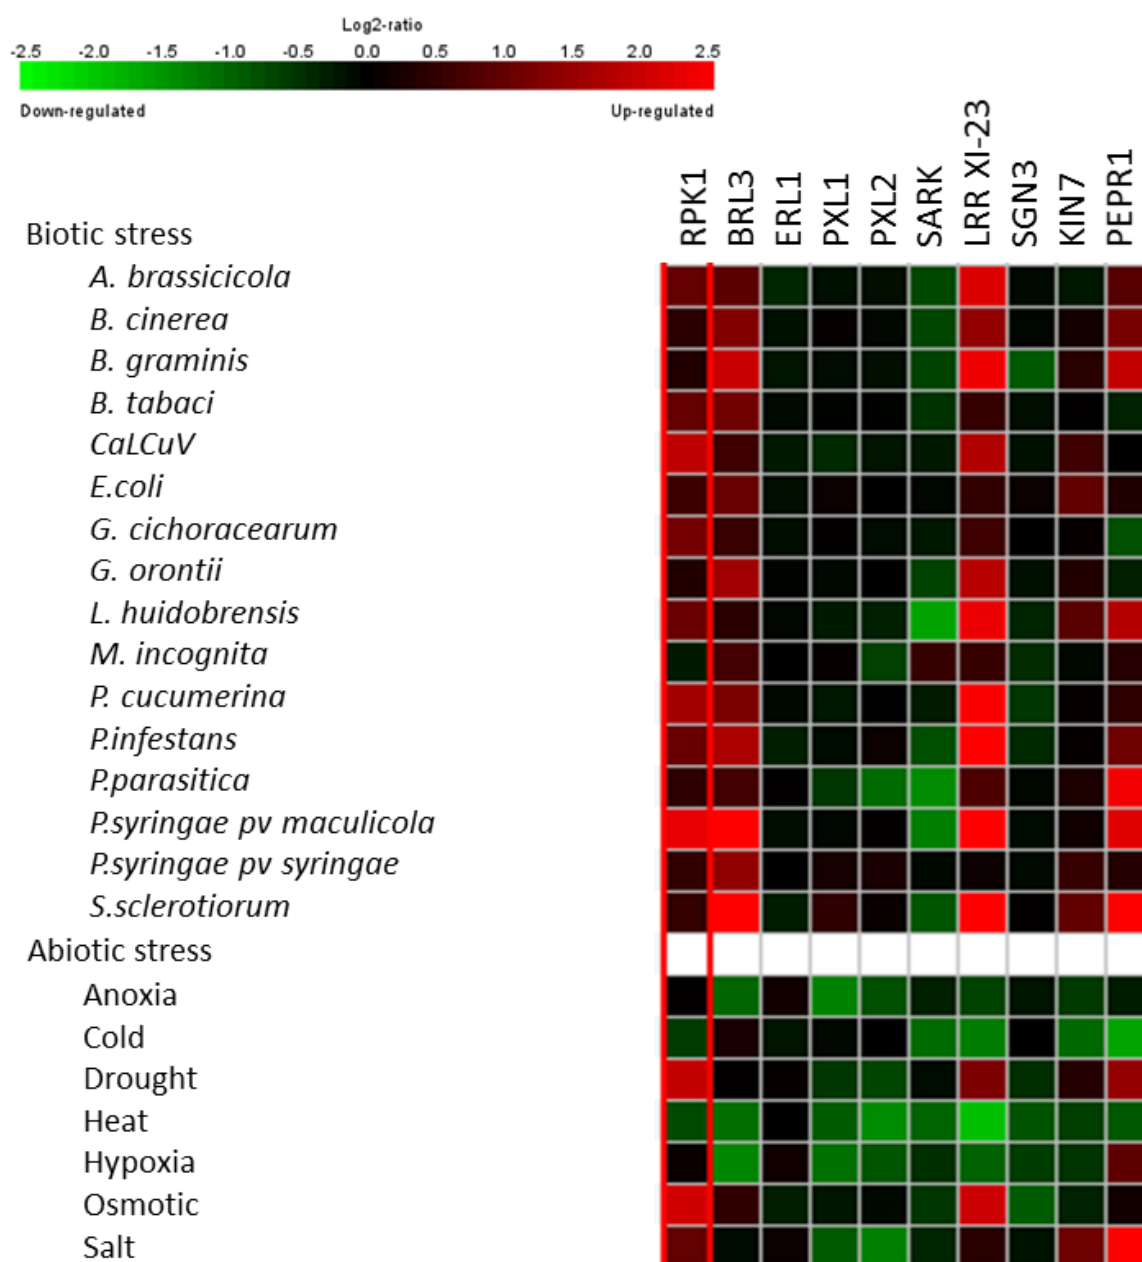

created with GENEVESTIGATOR

**Supplementary Figure S3.** Microarray analysis of the abiotic stress related LRR-RLK genes transcripts in response to biotic and abiotic stresses in WT (Col ecotype). Data was obtained from published microarray collections from Affymetrix *Arabidopsis* ATH1 Genome Array platform in Genevestigator (<https://genevestigator.com/>). Compendium-wide analysis was used to display the results by a condition search tool called perturbations. Data is displayed in the form of heatmap, which is based on Log2-ratio. Abiotic stress related LRR-RLK genes list from Supplemental table 1.

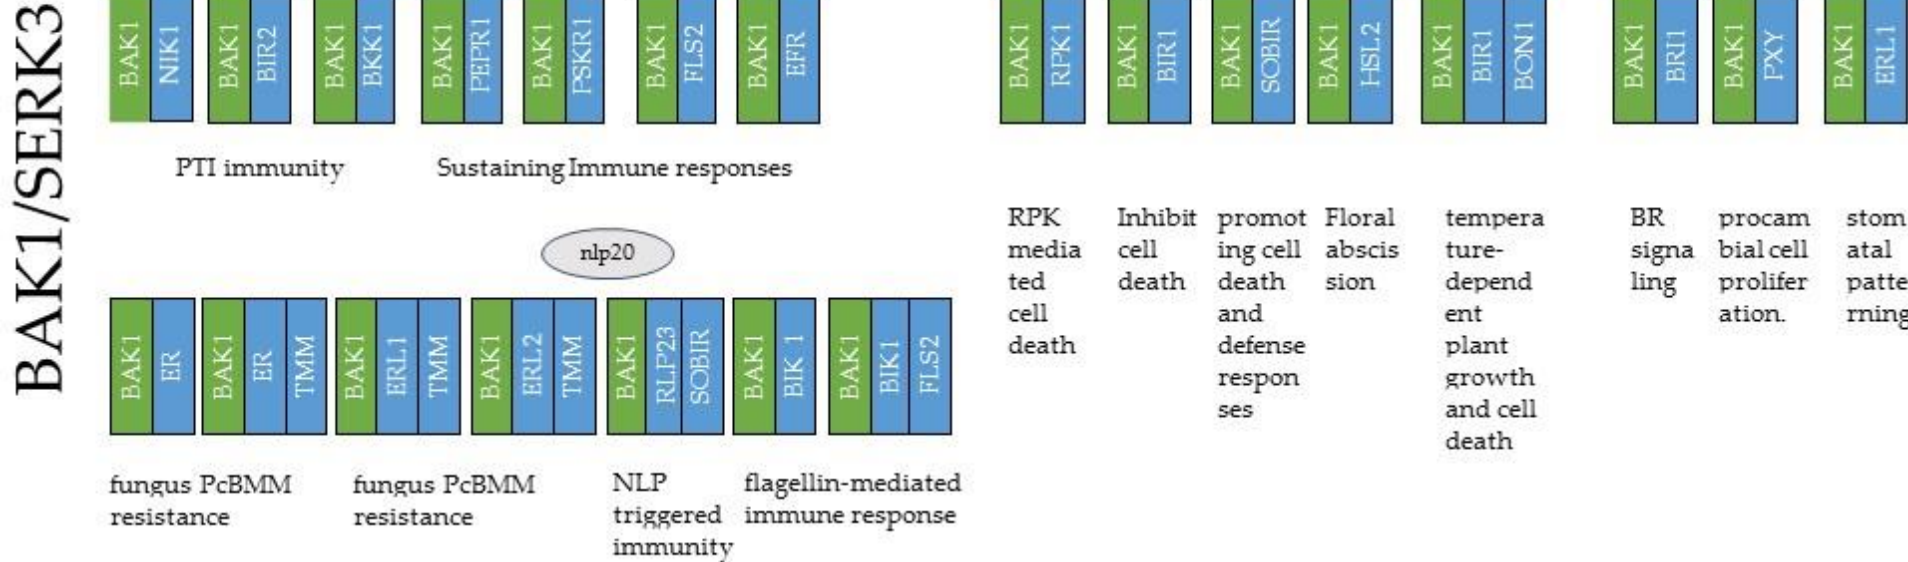

Supplementary Figure S4. Protein interactions of BAK1/SERK3 with other LRR-RLK with experimental proved functional role.

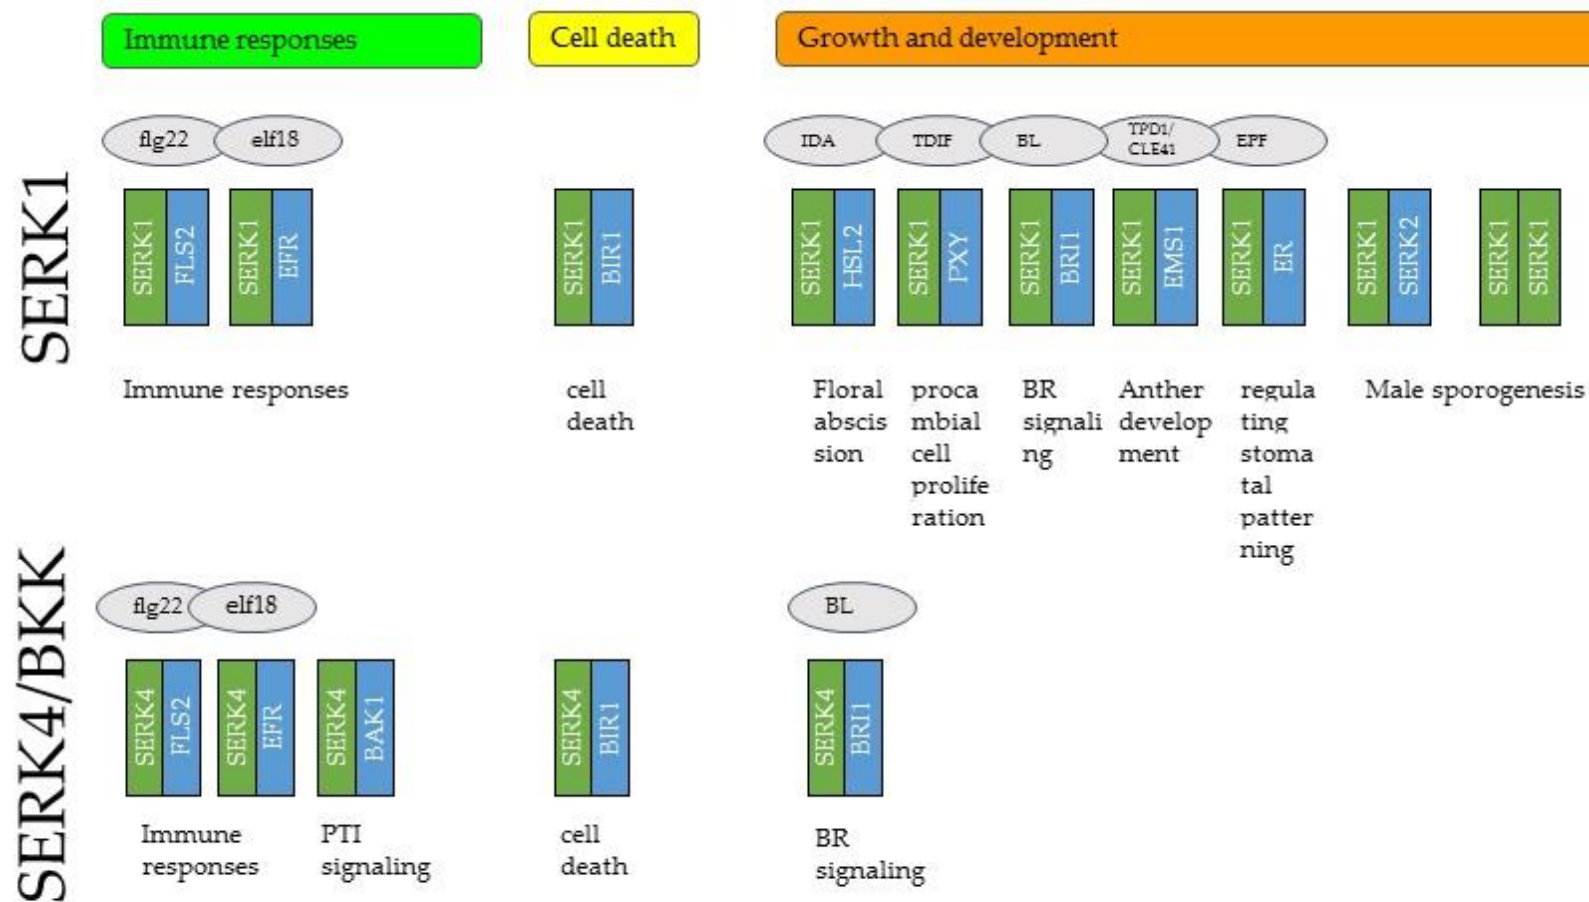

**Supplementary Figure S5.** Protein interactions of **SERK1** and **SERK4** with other LRR-RLK with experimental proved functional role.

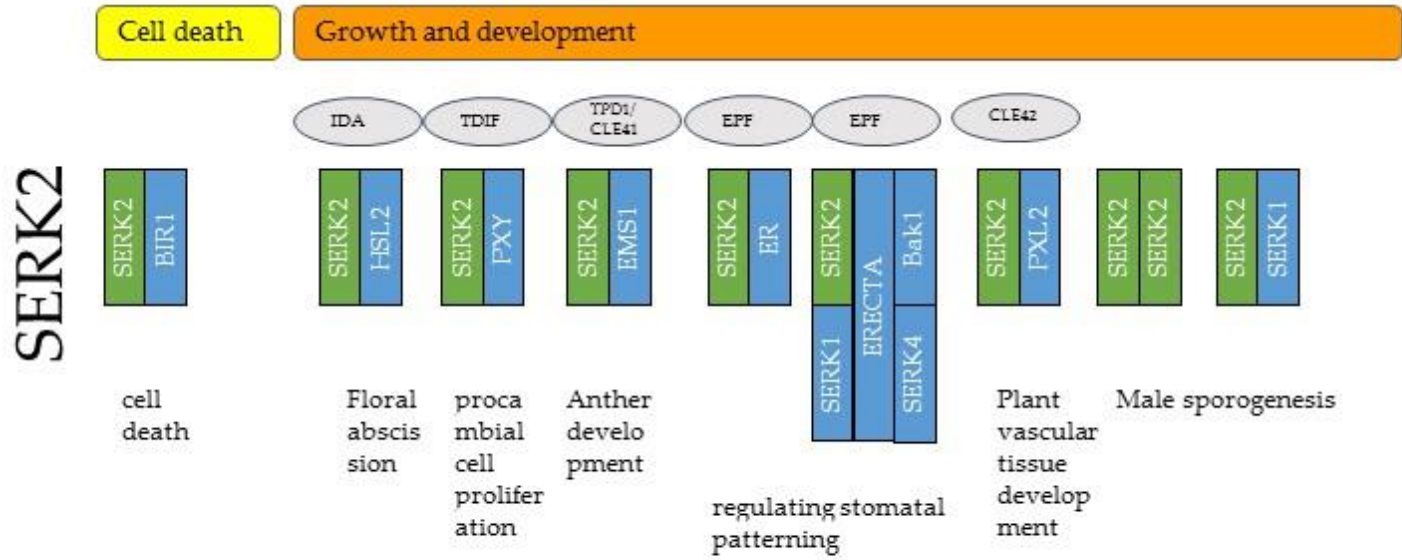

Supplementary Figure S6. Protein interactions of **SERK2** with other LRR-RLK with experimental proved functional role.

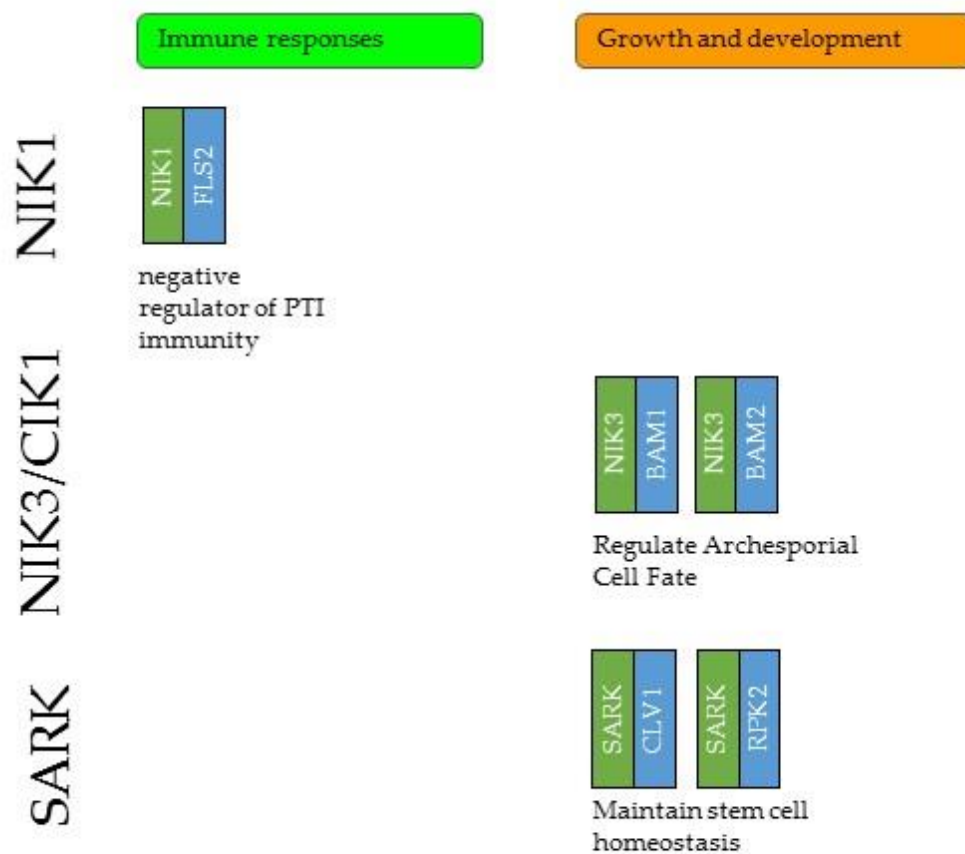

**Supplementary Figure S7.** Protein interactions of CIK's (NIK1, NIK3 and SARK) with other LRR-RLK with experimental proved functional role.



**Table S1.** Phenotypes of single mutants of LRR-RLK genes in *A.thaliana* tested under different biotic and abiotic stresses. The LRR-RLK genes names and their numbers were given. All data taken from different research studies about LRR-RLK genes investigating them under biotic (organism/s and/or component of tested organism) and abiotic (ABA, salt, temperature changes, dark, light intensity, drought, oxidative stress) stimuli and also appearance of senescence symptoms. OE indicates overexpression, NA indicates not available, WT- wild type.

| GENES         | ATG numbers | USED MUTANTS                                      | BIOTIC STRESS                                           | ABIOTIC STRESS                             | reference   |
|---------------|-------------|---------------------------------------------------|---------------------------------------------------------|--------------------------------------------|-------------|
| <b>BAK1</b>   | AT4G33430   | <i>bak1-5;</i><br><i>bak1-3,</i><br><i>bak1-4</i> | sensitive to <i>A.brassicicola</i>                      | insensitive to ABA                         | [73,74,160] |
|               |             |                                                   | sensitive to <i>P.syringae</i>                          |                                            |             |
|               |             | OEBAK1                                            | NA                                                      | NA                                         |             |
| <b>SERK2</b>  | AT1G34210   | <i>serk2</i>                                      | sensitive to <i>S.sclerotiorum</i>                      | sensitive to salt                          | [79,80]     |
|               |             |                                                   |                                                         | sensitive to ABA                           | [80]        |
|               |             | OESERK2                                           | NA                                                      | tolerant to salt                           | [80]        |
| <b>SERK4</b>  | AT2G13790   | <i>serk4;</i><br><i>serk4-1</i>                   | weakly sensitive to BR treatment                        | early senescence                           | [20,81,161] |
|               |             |                                                   | sensitive to flg22 treatment                            |                                            |             |
|               |             | OESERK4                                           | NA                                                      | delay senescence                           | [81]        |
| <b>BRI1</b>   | AT4G39400   | <i>bri1; bri1-5</i>                               | disease resistant                                       | sensitive to cold                          |             |
|               |             |                                                   |                                                         | sensitive to ABA                           | [74]        |
|               |             |                                                   |                                                         | sensitive to dark, light                   | [162]       |
|               |             | OEBRI                                             | NA                                                      | sensitive to ABA on seed germination stage | [162]       |
| <b>BIR1</b>   | AT5G48380   | <i>bir1-1</i>                                     | resistant to biotrophic oomycete                        | sensitive to temperature change            | [72,163]    |
|               |             | OEBIR1                                            | NA                                                      | NA                                         |             |
| <b>EFR</b>    | AT5G20480   | <i>efr</i>                                        | sensitive to <i>Agrobacterium</i>                       | NA                                         | [98]        |
|               |             | OEEFR                                             | NA                                                      | NA                                         |             |
| <b>SOBIR1</b> | AT2G31880   | <i>sobir1</i>                                     | insensitive to nlp20 treatment                          | NA                                         | [13]        |
|               |             |                                                   | sensitive to <i>S.sclerotiorum</i> and <i>B.cinerea</i> |                                            |             |
|               |             | OESOBIR1                                          | NA                                                      | NA                                         |             |
| <b>PSKR1</b>  | AT2G02220   | <i>pskr1;</i><br><i>pskr1-3</i>                   | sensitive to <i>A.brassicicola</i>                      | early senescence                           | [104]       |
|               |             |                                                   | resistant to <i>P.syringae</i>                          |                                            | [164]       |
|               |             |                                                   | sensitive to fungal elicitor E-Fol                      |                                            | [165]       |
|               |             | OEPSKR1                                           | NA                                                      | delay senescence                           | [104]       |
| <b>PEPR1</b>  | AT1G73080   | <i>pepr1</i>                                      | NA                                                      | sensitive to salt stress                   | [106]       |

|                       |           |                 |                                      |                                                        |       |
|-----------------------|-----------|-----------------|--------------------------------------|--------------------------------------------------------|-------|
|                       |           |                 |                                      |                                                        |       |
|                       |           |                 |                                      | insensitive to <i>AtPep1</i> -induced stomatal closure | [107] |
|                       |           | <i>OEPEPR1</i>  |                                      | NA                                                     |       |
| <b>LRR1</b>           | AT5G16590 | <i>lrr1</i>     | NA                                   | sensitive to drought                                   | [111] |
|                       |           | <i>OELRR1</i>   | resistant to <i>P.syringae</i>       | NA                                                     | [110] |
|                       |           |                 | resistant to <i>Hyaloperonospora</i> |                                                        | [110] |
| <b>KIN7</b>           | AT3G02880 | <i>kin7</i>     | NA                                   | sensitive to drought                                   | [111] |
|                       |           |                 |                                      | insensitive to increased CO2 level                     | [112] |
|                       |           | <i>OEKIN7</i>   | NA                                   | NA                                                     |       |
| <b>RLK902</b>         | AT3G17840 | <i>rlk902</i>   | sensitive to <i>P.syringae</i>       | NA                                                     | [116] |
|                       |           |                 | resistant to downy mildew            |                                                        | [115] |
|                       |           | <i>OERLK902</i> | resistant to <i>P.syringae</i>       | NA                                                     | [116] |
| <b>NIK1</b>           | AT5G16000 | <i>nik1</i>     | sensitive to geminivirus             | NA                                                     | [166] |
|                       |           | <i>OENIK1</i>   | resistant to kanamycin               | NA                                                     | [167] |
| <b>NIK3</b>           | AT1G60800 | <i>nik3</i>     | sensitive to geminivirus             | NA                                                     | [117] |
|                       |           |                 | sensitive to CaLCuV infection        |                                                        | [117] |
|                       |           | <i>OENIK3</i>   | NA                                   | NA                                                     |       |
| <b>FEI2</b>           | AT2G35620 | <i>fei2</i>     | sensitive to <i>B.cinerea</i>        | NA                                                     | [118] |
|                       |           | <i>OEFEI2</i>   | NA                                   | NA                                                     |       |
| <b>RPK2</b>           | AT3G02130 | <i>rpk2</i>     | sensitive to nematode infection      | NA                                                     | [128] |
|                       |           | <i>OERPK2</i>   | NA                                   | NA                                                     |       |
| <b>ERL1</b>           | AT5G62230 | <i>erl1</i>     | NA                                   | sensitive to salt                                      | [120] |
|                       |           | <i>OEERL1</i>   | NA                                   | NA                                                     |       |
| <b>PXL1</b>           | AT1G08590 | <i>pxl1</i>     | NA                                   | sensitive to cold and heat                             | [122] |
|                       |           | <i>OEPXL1</i>   | NA                                   | insensitive to heat                                    | [122] |
| <b>PXL2</b>           | AT4G28650 | <i>pxl2</i>     | NA                                   | sensitive to ABA                                       | [121] |
|                       |           | <i>OEPXL2</i>   | NA                                   | NA                                                     |       |
| <b>LRR XI-23/RLK7</b> | AT1G09970 | <i>lrr/rlk7</i> | NA                                   | tolerant to H2O2 treatment                             | [127] |
|                       |           | <i>OELRK7</i>   | NA                                   | intolerant to H2O2 treatment                           | [127] |

|             |           |               |    |                                       |       |
|-------------|-----------|---------------|----|---------------------------------------|-------|
| <b>RPK1</b> | AT1G69270 | <i>rpk1</i>   | NA | insensitive to ABA                    | [168] |
|             |           | <i>OERPK1</i> | NA | tolerant to drought, oxidative stress | [169] |
| <b>BRL3</b> | AT3G13380 | <i>brl3</i>   | NA | sensitive to high glucose             | [124] |
|             |           | <i>OEBRL3</i> | NA | tolerant to drought                   | [125] |
| <b>SARK</b> | AT4G30520 | <i>sark-1</i> | NA | delay leaf senescence                 | [130] |
|             |           | <i>OESARK</i> | NA | early senescence                      | [130] |
| <b>SGN3</b> | AT4G20140 | <i>sgn3</i>   | NA | hypersensitive to low potassium       | [123] |
|             |           | <i>OESGN3</i> | NA | NA                                    |       |

**Table S2.** Orthologous of stress related LRR-RLKs genes in *A.thaliana*, *O.sativa*, *G.max*, *M.truncatula*, *Populus*, *V. vinifera*, *S.lycopersicum*, *B.napus*, *Z.mays*. Orthologous of LRR-RLKs genes tested for different stress stimuli were taken from ATTED database (<https://atted.jp/>). The respective sequence of shown locuses for different plant species are in ATTED database.

| Genes              | Plants            |                 |              |                     |                |                   |                       |                |               |
|--------------------|-------------------|-----------------|--------------|---------------------|----------------|-------------------|-----------------------|----------------|---------------|
|                    | <i>A.thaliana</i> | <i>O.sativa</i> | <i>G.max</i> | <i>M.truncatula</i> | <i>Populus</i> | <i>V.vinifera</i> | <i>S.lycopersicum</i> | <i>B.napus</i> | <i>Z.mays</i> |
| RKL1               | RLK902            | LOC4332106      | LOC100781597 | LOC11408124         |                | LOC100243943      | LOC101247929          | LOC103833000   | LOC542104     |
|                    |                   | LOC4333893      | LOC100788892 | LOC11435862         | LOC7474836     | LOC100267283      | LOC101254257          | LOC103838993   | LOC100285260  |
|                    |                   |                 | LOC100801582 | LOC25497283         | LOC7487396     |                   | LOC101268851          | LOC103869641   | LOC100285980  |
|                    |                   |                 | LOC100818955 |                     |                |                   |                       |                |               |
| PEPR2              | PEPR1             | LOC4345707      | LOC100778035 | LOC11415181         | LOC7486765     | LOC100258774      | PORK1                 | LOC103830768   | LOC100381406  |
|                    |                   | LOC4345708      | LOC100781454 | LOC25488017         | LOC7497791     |                   |                       | LOC103872555   | LOC103643254  |
|                    |                   |                 | LOC100802056 |                     |                |                   |                       | LOC103872556   |               |
|                    |                   |                 | LOC100817655 |                     |                |                   |                       |                |               |
| IRK                | AT5G01890         | LOC4327614      | LOC100780307 | LOC11433630         | LOC7459241     | LOC100248331      | LOC101247434          | LOC103841545   | LOC100274594  |
|                    |                   | LOC4332757      | LOC100791204 | LOC25489825         | LOC7482595     | LOC100257029      | LOC101254001          | LOC103850399   | LOC100304322  |
|                    |                   | LOC4339111      | LOC100791629 |                     | LOC7497359     |                   | LOC101262241          |                | LOC103630489  |
|                    |                   |                 | LOC100813535 |                     |                |                   |                       |                |               |
| FEI2               | FEI1              | LOC4332359      | LOC100816028 | LOC11410978         |                | LOC100264793      | LOC101257290          | LOC103857572   | LOC100280440  |
|                    |                   |                 | LOC100819230 |                     |                |                   |                       | LOC103865464   | LOC100281527  |
|                    |                   |                 |              |                     |                |                   |                       | LOC103867340   |               |
| LRR XI-23/<br>RLK7 | IKU2              | LOC4352872      | LOC100779554 | LOC11418845         | LOC7469669     | LOC100248069      | LOC101243702          | LOC103837012   | LOC103650295  |
|                    |                   |                 | LOC100809356 | LOC25490156         |                | LOC109121676      | LOC101255038          | LOC103843324   |               |
|                    |                   |                 | LOC100811489 |                     |                |                   |                       | LOC103868127   |               |
|                    |                   |                 |              |                     |                |                   |                       | LOC103871776   |               |
| PXY                |                   | LOC4344655      | LOC100809695 | LOC25491892         | LOC7465499     | LOC100266344      | LOC101256593          | LOC103860599   | LOC100383417  |
|                    |                   |                 | LOC100813189 |                     |                |                   | LOC101263386          |                |               |
| PXL1               | AT4G28650         | LOC4328049      | LOC100779939 | LOC11411044         | LOC7461486     | LOC109122934      | LOC101246467          | LOC103836383   | LOC103626517  |
|                    |                   | LOC4331599      | LOC100788430 | LOC11421682         | LOC7487195     |                   | LOC101249348          | LOC103854284   | LOC103631713  |
|                    |                   |                 | LOC100789665 | LOC25484201         | LOC7487717     |                   |                       |                | LOC103639559  |
|                    |                   |                 | LOC100793873 |                     |                |                   |                       |                |               |
|                    |                   |                 | LOC100811284 |                     |                |                   |                       |                |               |
| PXL2               | AT1G08590         | LOC4328049      | LOC100779939 | LOC11411044         | LOC7461486     | LOC109122934      | LOC101246467          | LOC103836383   | LOC103626517  |
|                    |                   | LOC4331599      | LOC100788430 | LOC11421682         | LOC7487195     |                   | LOC101249348          | LOC103854284   | LOC103631713  |
|                    |                   |                 | LOC100789665 | LOC25484201         | LOC7487717     |                   |                       |                | LOC103639559  |
|                    |                   |                 | LOC100793873 |                     |                |                   |                       |                |               |
|                    |                   |                 | LOC100811284 |                     |                |                   |                       |                |               |
|                    |                   |                 | LOC100817339 |                     |                |                   |                       |                |               |

|        |           |              |              |             |            |              |              |              |              |
|--------|-----------|--------------|--------------|-------------|------------|--------------|--------------|--------------|--------------|
| BAM1   | BAM2      | LOC4332141   | RLK1         | LOC11408427 | LOC7465379 | LOC100258232 | LOC101248733 | LOC103834155 |              |
|        | BAM3      | LOC4334273   | RLK3         | LOC11424811 | LOC7465545 | LOC100855393 | LOC101248913 | LOC103858059 | LOC103644083 |
|        |           | LOC4342345   | RLK2         | LOC11431479 |            |              | LOC101264597 | LOC103860625 | LOC100279272 |
|        |           |              | LOC100499646 | LOC25490539 |            |              |              | LOC103861192 | LOC100383797 |
|        |           |              | LOC100777902 |             |            |              |              | LOC103874010 | LOC109939609 |
|        |           |              | LOC100803075 |             |            |              |              |              |              |
|        |           |              | LOC100815103 |             |            |              |              |              |              |
| SERK1  |           |              | LOC100816158 |             |            |              |              |              |              |
|        | SERK4     | LOC4336035   | LOC100305355 | LOC11421599 | LOC7478140 | LOC100247340 | SERK3A       | LOC103830829 | LOC542015    |
|        | SERK5     | LOC4344785   | SERK1        | LOC11428529 |            | LOC100247683 | SERK1        | LRRII6       | LOC542016    |
|        | BAK1      |              | LOC100789884 | LOC11430748 |            | LOC100253855 | SERK3B       | LOC103834483 | LOC542670    |
|        | SERK2     |              | LOC100800522 | LOC25485006 |            | LOC100266543 |              | LRRII5       | LOC103641205 |
| CLV1   |           |              | LOC100813918 |             |            |              |              | LRRII4       |              |
|        |           |              |              |             |            |              |              | LOC103862237 |              |
|        |           | LOC4342080   | NARK         | LOC11438702 | LOC7490636 | LOC100260741 | CLV1         | LOC103832028 | LOC103626458 |
| CRN    |           |              | CLV1A        | LOC11439632 |            |              |              |              |              |
|        |           |              | LOC102664073 |             |            |              |              |              |              |
| NIK1   |           | LOC4326956   | LOC102664172 | LOC11437782 | LOC7491429 | LOC104880871 | LOC101055499 | LOC103846585 | LOC100285492 |
|        |           |              | LOC102664273 |             |            |              |              | LOC103850856 |              |
| NIK2   |           |              | LOC103856008 |             |            |              |              | LOC103856008 |              |
|        | NIK2      | LOC4330602   | LOC100305388 | LOC25479984 | LOC7466941 | LOC100249555 | LOC101245114 | LRRII2       | LOC100382590 |
|        |           | LOC4340743   | LOC100790194 | LOC25495505 | LOC7468388 | LOC100253129 | LOC101246914 | LOC103856175 | LOC100280233 |
|        |           |              | LOC100797768 | LOC25497639 | LOC7483901 |              | LOC101250403 | LOC103875371 | LOC100281584 |
|        |           |              | LOC100798412 |             |            |              |              |              |              |
| NIK3   |           |              | LOC100804283 |             |            |              |              |              |              |
|        |           |              | LOC100806650 |             |            |              |              |              |              |
|        |           | LOC4327640   | LOC100784164 | LOC11407415 | LOC7460771 | LOC100256748 | LOC101245842 | LRRII1       | LOC100272802 |
| RLK902 |           | LOC9268978   | LOC100806943 |             | LOC7469057 |              | LOC101258453 |              | LOC100383570 |
|        |           |              |              |             |            |              |              |              | LOC103635459 |
|        | RKL1      | LOC4332106   | LOC100781597 | LOC11408124 | LOC7474836 | LOC100243943 | LOC101247929 | LOC103833000 | LOC542104    |
|        |           | LOC4333893   | LOC100788892 | LOC11435862 | LOC7487396 | LOC100267283 | LOC101254257 | LOC103838993 | LOC100285260 |
| EFR    |           |              | LOC100801582 | LOC25497283 |            |              | LOC101268851 | LOC103869641 | LOC100285980 |
|        |           |              | LOC100818955 |             |            |              |              |              |              |
|        | AT3G47090 | LOC4324494   | LOC100776429 | LOC11406338 | LOC7463459 | LOC100241667 | LOC101246542 | LOC103832809 | LOC103626075 |
|        | AT3G47110 | LOC9266358   | LOC100777490 | LOC11406710 | LOC7463460 | LOC100258860 | LOC101250857 | LOC103838692 | LOC103628995 |
|        | AT3G47570 | LOC9267517   | LOC100778093 | LOC11406756 | LOC7468441 | LOC100259050 | LOC101251570 | LOC103839158 | LOC103634832 |
|        | AT3G47580 | LOC9269230 ( | LOC100782685 | LOC11407069 | LOC7469474 | LOC100259715 | LOC101256934 | LOC103841098 | LOC103634833 |
|        | AT5G39390 | LOC9270033   | LOC100783512 | LOC11407070 | LOC7474826 | LOC100263845 | LOC101257348 | LOC103841563 | LOC103640781 |
|        |           | LOC9271075   | LOC100785561 | LOC11407873 | LOC7476326 |              | LOC101258336 | LOC103844376 | LOC103641369 |

|              |              |              |            |              |              |              |              |
|--------------|--------------|--------------|------------|--------------|--------------|--------------|--------------|
| LOC9271462 ( | LOC100786600 | LOC11408622  | LOC7482217 | LOC100265904 | LOC101261427 | LOC103845674 | LOC103649762 |
| LOC9271745   | LOC100792724 | LOC11408648  | LOC7486319 | LOC109122564 | LOC101261723 | LOC103848469 | LOC103650269 |
| LOC9272400   | LOC100801459 | LOC11409452  | LOC7494927 |              | LOC101266316 | LOC103848471 | LOC103652739 |
| LOC4324497   | LOC100813523 | LOC11409458  |            |              | LOC112940090 | LOC103856446 | LOC103652958 |
| LOC4324499   | LOC102664380 | LOC11410960  |            |              |              | LOC103856633 | LOC103653760 |
| LOC4324501   | LOC102664710 | LOC11411980  |            |              |              | LOC103857204 | LOC103653761 |
| LOC4328700   | LOC106794146 | LOC11413493  |            |              |              | LOC103864894 | LOC103653766 |
| LOC4328704   |              | LOC11415807  |            |              |              | LOC103864895 | LOC103653770 |
| LOC4328722   |              | LOC11415808  |            |              |              | LOC103867613 | LOC103653773 |
| LOC4328724   |              | LOC11416344  |            |              |              | LOC103868348 | LOC103654972 |
| LOC4328725   |              | LOC11416554  |            |              |              | LOC103869459 | LOC100272957 |
| LOC4329980   |              | LOC11416555  |            |              |              | LOC103873225 | LOC109940253 |
| LOC4329982   |              | LOC11418993  |            |              |              | LOC103873260 | LOC109946042 |
| LOC4329983   |              | LOC11419156  |            |              |              | LOC103873370 |              |
| LOC4330078   |              | LOC11421706  |            |              |              |              |              |
| LOC4341380   |              | LOC11423999  |            |              |              |              |              |
| LOC4342285 ( |              | LOC11426285  |            |              |              |              |              |
| LOC4345065 ( |              | LOC11426548  |            |              |              |              |              |
| LOC4348346   |              | LOC11428017  |            |              |              |              |              |
| LOC4349906   |              | LOC11430041  |            |              |              |              |              |
| LOC4350541   |              | LOC11432152  |            |              |              |              |              |
| LOC4350749   |              | LOC11438431  |            |              |              |              |              |
| LOC4350958   |              | LOC25482466  |            |              |              |              |              |
| LOC107275420 |              | LOC25482467  |            |              |              |              |              |
| LOC107275524 |              | LOC25484776  |            |              |              |              |              |
| LOC107276008 |              | LOC25484777  |            |              |              |              |              |
| LOC107276079 |              | LOC25484778  |            |              |              |              |              |
| LOC107276445 |              | LOC25486456  |            |              |              |              |              |
| LOC107276510 |              | LOC25487142  |            |              |              |              |              |
| LOC107276755 |              | LOC25487144  |            |              |              |              |              |
| LOC107277108 |              | LOC25487145  |            |              |              |              |              |
| LOC112937978 |              | LOC25496117  |            |              |              |              |              |
|              |              | LOC25501419  |            |              |              |              |              |
|              |              | LOC112422017 |            |              |              |              |              |
|              |              | LOC112422018 |            |              |              |              |              |
|              |              | LOC112422019 |            |              |              |              |              |
|              |              | LOC112422020 |            |              |              |              |              |



*LRR1*

AT3G02880

LOC103843628

LOC103846319

LOC103851054

LOC103870882



**Table S3.** Genetic tools in different crop plants in investigation of stress-related LRR-RLKs. Generated mutants defective in LRR-RLK genes in *N. benthamiana*, *S. lycopersicum*, *S. tuberosum*, *S. commersonii*, *O. sativa*, *T. aestivum*, *H. vulgare*, *B. distachyon* were taken from different research studies about role of LRR-RLK genes. OE-overexpression; Ri or RNAi – silenced mutant line, TRV- tobacco rattle virus, VIGS- Virus-induced gene silencing, p-promoter.

| <b>LRR-RLK gene</b> | <b><i>N. benthamiana</i></b> | <b><i>S. lycopersicum</i>/<br/><i>S. tuberosum</i>/<br/><i>S. commersonii</i></b> | <b><i>O. sativa</i></b>                                                        | <b><i>T. aestivum</i><br/>/<i>H. vulgare</i><br/>/<i>B. distachyon</i></b>                                                                 | <b>Reference</b>              |
|---------------------|------------------------------|-----------------------------------------------------------------------------------|--------------------------------------------------------------------------------|--------------------------------------------------------------------------------------------------------------------------------------------|-------------------------------|
| <i>BRI</i>          | TRV:NbBRI1                   | SIBRI1 OE;<br>cu3 mutant;<br>StBRI1 in bri1-5;<br>StBRI1 Ri mutant                | OE anti-OsBRI1;<br>d61-4 mutant                                                | OETaBRI1 in <i>Arabidopsis</i> ;<br>site direct modification of<br>TaBRI1 (Cas9/gRNA);<br>silencing (VIGS) of BRI1;<br>BdBRI1-RNAi mutants | [83,86-89,91-<br>94,126, 181] |
| <i>EFR</i>          | AtEFR into tobacco           | AtEFR into tomato ;<br>AtEFR into potato                                          | EFR:XA21 chimera in <i>Arabidopsis</i>                                         | pActEFR into wheat                                                                                                                         | [98,99,100,103,<br>170]       |
| <i>ER</i>           | -                            | pER::ER (At)<br>genomic in tomato                                                 | pER::ER (At)<br>genomic in rice<br>Loss-of-function mutants of<br>OsER1, OsER2 | vasc1-1 mutants                                                                                                                            | [171-174]                     |
| <i>CLV1</i>         | -                            | Slclv1 mutant                                                                     | -                                                                              | -                                                                                                                                          | [175,176]                     |
| <i>SOBIR1</i>       | OE of NbSOBIR1 in tobacco    | OE of SISOBIR1 in tobacco                                                         | -                                                                              | -                                                                                                                                          | [13,18,95,96]                 |
|                     | TRV:NbSOBIR1                 | TRV:SISOBIR1                                                                      |                                                                                |                                                                                                                                            |                               |
|                     | sobir1/sobir1-like           |                                                                                   |                                                                                |                                                                                                                                            |                               |
| <i>BAK1</i>         | NbSerk3A                     | SISERK3A silencing (VIGS)                                                         | Ectopic AtBAK1                                                                 | -                                                                                                                                          | [74-76,177]                   |
|                     | NbSerk3B                     | SISERK3B silencing (VIGS)                                                         |                                                                                |                                                                                                                                            |                               |
| <i>LRR1</i>         | -                            | -                                                                                 | LRR1Ri                                                                         | TaLRRK-6D/HvLRRK-6H                                                                                                                        | [113,114,127]                 |
| <i>SERK2</i>        | -                            | -                                                                                 | OsSerk2Ri                                                                      | -                                                                                                                                          | [77,79]                       |
| <i>SERK1</i>        | -                            | -                                                                                 | OEOsSerk1                                                                      | -                                                                                                                                          | [78]                          |
| <i>RLK1</i>         | -                            | -                                                                                 | Ir-Irr (Ri)                                                                    | -                                                                                                                                          | [178,179]                     |
| <i>PEPR1</i>        | -                            | PERK1 RNAi                                                                        | -                                                                              | -                                                                                                                                          | [108, 180]                    |
| <i>PSKR1</i>        | -                            | -                                                                                 | OE OsPSKR1                                                                     | -                                                                                                                                          | [104,105]                     |
| <i>BRL3</i>         | -                            | -                                                                                 | D61-4 allele                                                                   | -                                                                                                                                          | [124,126]                     |
| <i>ERL1</i>         | -                            | -                                                                                 | mutations in OsERL                                                             | -                                                                                                                                          | [119,120]                     |

**Table S4** Potential interactions of stress-related LRR- RLKs (from LRR II family) with other LRR- RLKs. Formation of heterodimers were taken from ATTED database. The formation of heterodimers between the LRR- RLKs were labeled as “heterodimer”. The inside box cross between two LRR- RLK genes; one from column and second from row. The method/s of identifying heterodimer formation was solid-phase assay. NA indicates data not available

|                  | Co-receptors (LRR II) |                                    |                                    |                                    |                                    |                                    |                                    |           |
|------------------|-----------------------|------------------------------------|------------------------------------|------------------------------------|------------------------------------|------------------------------------|------------------------------------|-----------|
| LRR- RLK         | SERK2                 | SERK1                              | SERK4/ BKK1                        | SERK3/ BAK1                        | SARK/Cik3                          | NIK1                               | NIK3/Cik1                          | Reference |
| <b>IOS1</b>      | NA                    | heterodimer<br>(solid-phase assay) | NA                                 | [152,153] |
| <b>PSY1R</b>     | NA                    | heterodimer<br>(solid-phase assay) | NA                                 | [152,153] |
| <b>SRF6</b>      | NA                    | heterodimer<br>(solid-phase assay) | NA                                 | [152,153] |
| <b>SRF7</b>      | NA                    | heterodimer<br>(solid-phase assay) | NA                                 | [152,153] |
| <b>SRF8</b>      | NA                    | heterodimer<br>(solid-phase assay) | NA                                 | [152,153] |
| <b>GHR1</b>      | NA                    | heterodimer<br>(solid-phase assay) | NA                                 | [153]     |
| <b>SRF2</b>      | NA                    | NA                                 | heterodimer<br>(solid-phase assay) | heterodimer<br>(solid-phase assay) | heterodimer<br>(solid-phase assay) | heterodimer<br>(solid-phase assay) | NA                                 | [152,153] |
| <b>SRF3</b>      | NA                    | NA                                 | heterodimer<br>(solid-phase assay) | heterodimer<br>(solid-phase assay) | heterodimer<br>(solid-phase assay) | heterodimer<br>(solid-phase assay) | NA                                 | [152,153] |
| <b>GSO1</b>      | NA                    | NA                                 | NA                                 | heterodimer<br>(solid-phase assay) | heterodimer<br>(solid-phase assay) | heterodimer<br>(solid-phase assay) | heterodimer<br>(solid-phase assay) | [152,153] |
| <b>BRL3</b>      | NA                    | NA                                 | heterodimer<br>(solid-phase assay) | heterodimer<br>(solid-phase assay) | heterodimer<br>(solid-phase assay) | heterodimer<br>(solid-phase assay) | NA                                 | [152,153] |
| <b>SARK/CIK3</b> | NA                    | heterodimer<br>(solid-phase assay) | heterodimer<br>(solid-phase assay) | heterodimer<br>(solid-phase assay) | NA                                 | heterodimer<br>(solid-phase assay) | NA                                 | [152]     |

|               |                                    |    |                                    |                                                            |                                    |                                    |                                    |           |
|---------------|------------------------------------|----|------------------------------------|------------------------------------------------------------|------------------------------------|------------------------------------|------------------------------------|-----------|
| <b>BRL1</b>   | NA                                 | NA | NA                                 | heterodimer<br>(anti tag CoIP, yeast two-<br>hybrid assay) | heterodimer<br>(solid-phase assay) | heterodimer<br>(solid-phase assay) | NA                                 | [17, 152] |
| <b>SERK5</b>  | NA                                 | NA | heterodimer<br>(solid-phase assay) | heterodimer<br>(solid-phase assay)                         | heterodimer<br>(solid-phase assay) | NA                                 | NA                                 | [152,153] |
| <b>FEI1</b>   | heterodimer<br>(solid-phase assay) | NA | NA                                 | heterodimer<br>(solid-phase assay)                         | heterodimer<br>(solid-phase assay) | NA                                 | NA                                 | [153]     |
| <b>SRF5</b>   | NA                                 | NA | NA                                 | heterodimer<br>(solid-phase assay)                         | heterodimer<br>(solid-phase assay) | heterodimer<br>(solid-phase assay) | NA                                 | [152,153] |
| <b>SRF1</b>   | NA                                 | NA | NA                                 | heterodimer<br>(solid-phase assay)                         | heterodimer<br>(solid-phase assay) | heterodimer<br>(solid-phase assay) | NA                                 | [152,153] |
| <b>RLK902</b> | NA                                 | NA | NA                                 | heterodimer<br>(solid-phase assay)                         | heterodimer<br>(solid-phase assay) | NA                                 | heterodimer<br>(solid-phase assay) | [152,153] |
| <b>NIK2</b>   | NA                                 | NA | NA                                 | heterodimer<br>(solid-phase assay)                         | heterodimer<br>(solid-phase assay) | NA                                 | NA                                 | [152,153] |
| <b>PRK1</b>   | NA                                 | NA | NA                                 | heterodimer<br>(solid-phase assay)                         | NA                                 | heterodimer<br>(solid-phase assay) | NA                                 | [153]     |
| <b>NIK3</b>   | heterodimer<br>(solid-phase assay) | NA | NA                                 | heterodimer<br>(solid-phase assay)                         | NA                                 | NA                                 | NA                                 | [152,153] |
| <b>PRK6</b>   | NA                                 | NA | NA                                 | heterodimer<br>(solid-phase assay)                         | NA                                 | NA                                 | heterodimer<br>(solid-phase assay) | [152,153] |
| <b>PRK2A</b>  | NA                                 | NA | NA                                 | NA                                                         | NA                                 | NA                                 | heterodimer<br>(solid-phase assay) | [153]     |
| <b>PRK4</b>   | NA                                 | NA | NA                                 | NA                                                         | NA                                 | NA                                 | heterodimer<br>(solid-phase assay) | [152]     |
| <b>PRK5</b>   | NA                                 | NA | NA                                 | NA                                                         | NA                                 | NA                                 | heterodimer<br>(solid-phase assay) | [153]     |
| <b>MRLK</b>   | NA                                 | NA | NA                                 | NA                                                         | NA                                 | NA                                 | heterodimer<br>(solid-phase assay) | [153]     |
| <b>BRL2</b>   | heterodimer<br>(solid-phase assay) | NA | NA                                 | NA                                                         | NA                                 | NA                                 | NA                                 | [153]     |
